# Supplementary material for: Neodymium recovery from NdFeB magnets: a sustainable, instantaneous, and cost-effective method
Source: Royal Society of Chemistry journal article supplement (doi:10.1039/d3gc03756h), 2024-01-01
Supplement: d3gc03756h1.pdf [file d3gc03756h1.pdf]

## Electronic Supporting Information

### Neodymium recovery from e-waste: A sustainable, instantaneous, and cost-effective method

Sandeep Bose<sup>a</sup>, Benilde Mizero<sup>a</sup>, and Parisa A. Ariya<sup>a, b\*</sup>

<sup>a</sup>Department of Chemistry, McGill University, Montreal, Quebec H3A 0B8, Canada

<sup>b</sup>Department of Atmospheric and Oceanic Sciences, McGill University, Montreal, Quebec H3A 0B9, Canada

\* Email: [parisa.ariya@mcgill.ca](mailto:parisa.ariya@mcgill.ca)

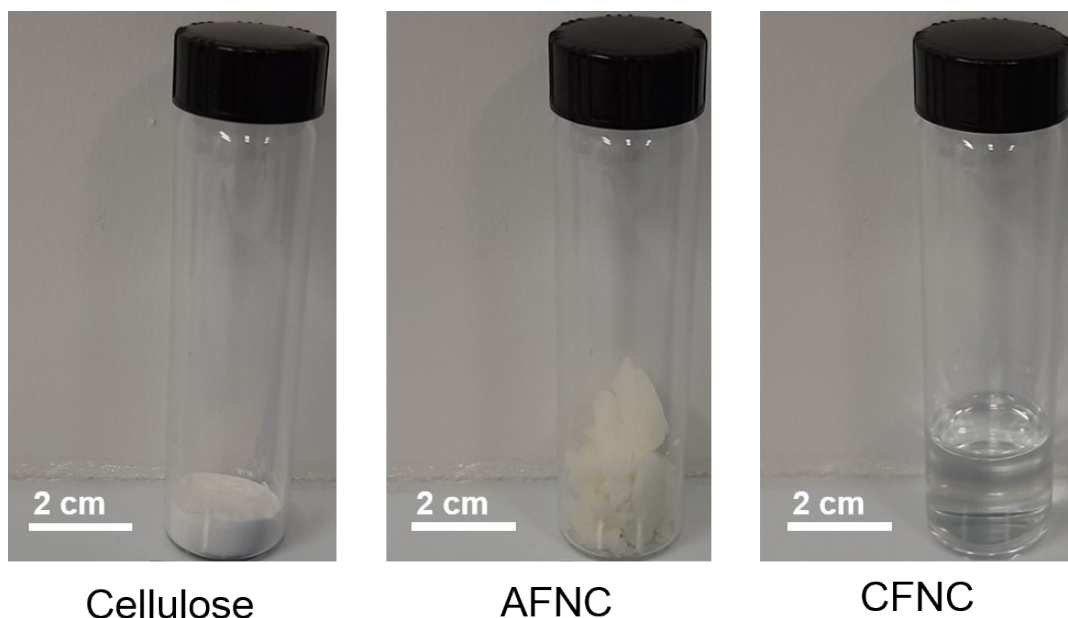

**Figure S1.** Image of the starting material (cellulose powder), synthesized aldehyde functionalized nanocellulose (AFNC), and carboxylate functionalized nanocellulose (CFNC).

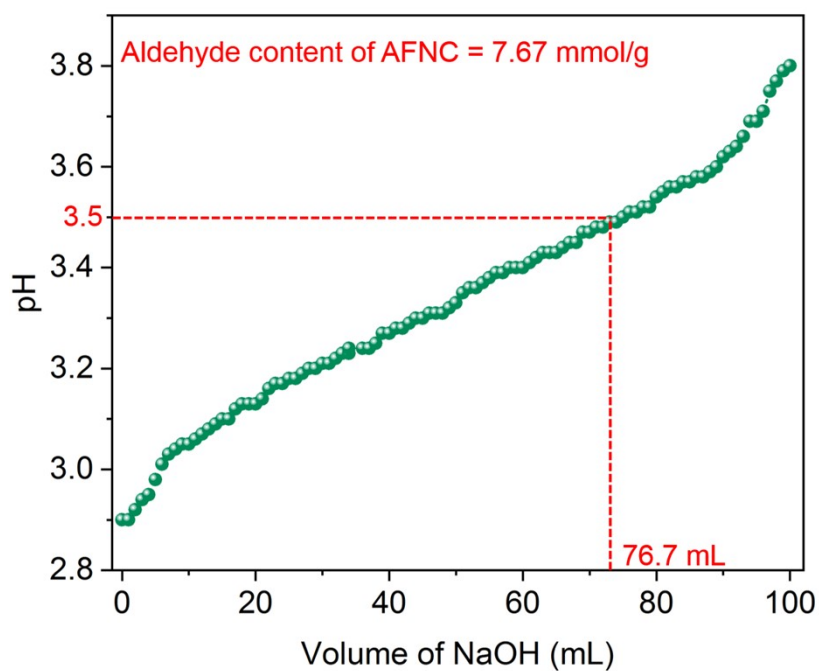

**Figure S2.** Aldehyde content measurement of AFNC by hydroxylamine hydrochloride titration.

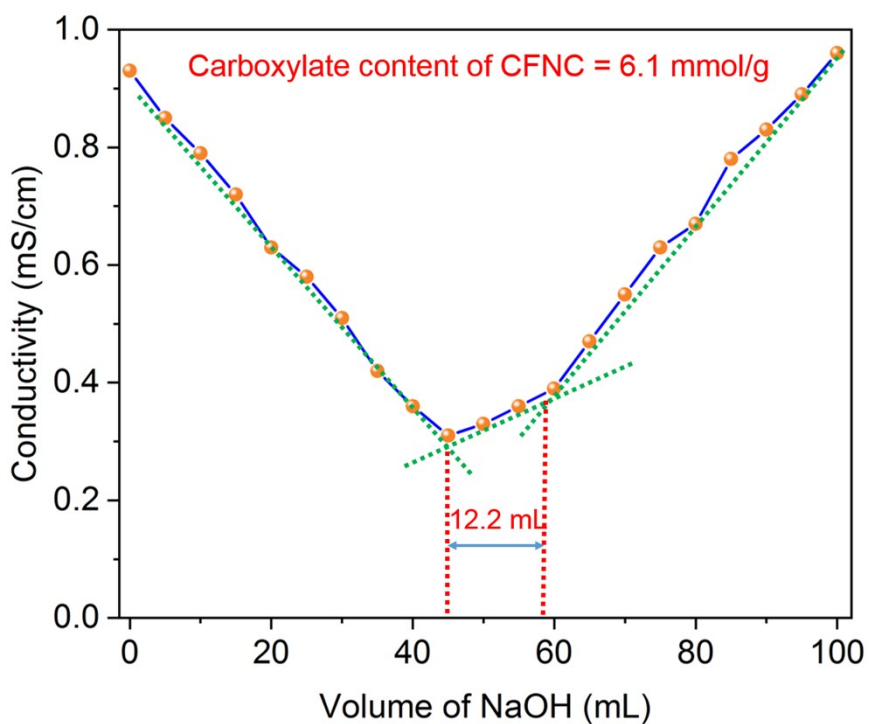

**Figure S3.** Conductometric titration curve of CFNC to measure the carboxylate content.

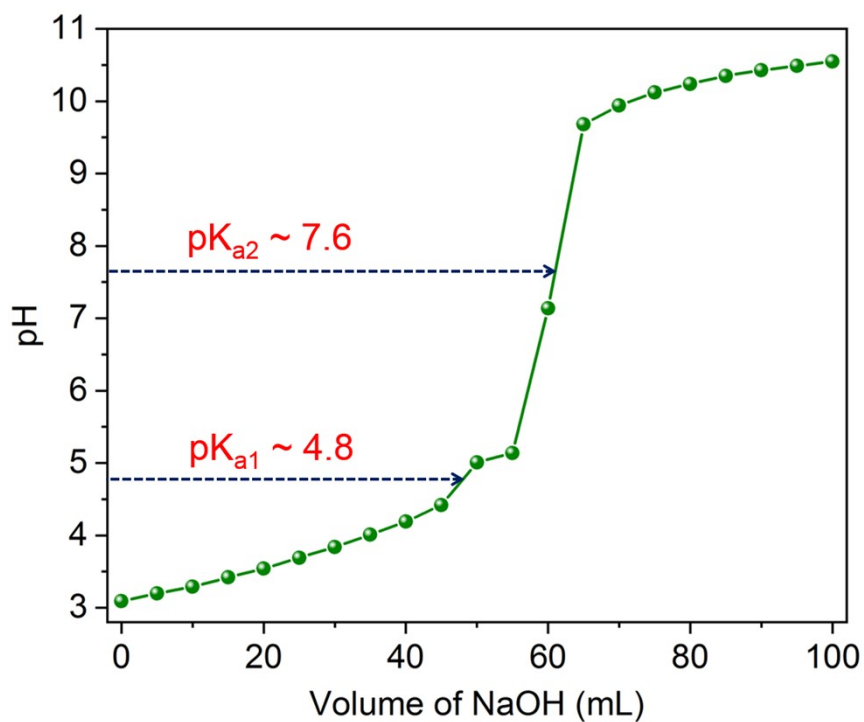

**Figure S4.** pH titration curve of CFNC obtained simultaneously with conductometric titration.

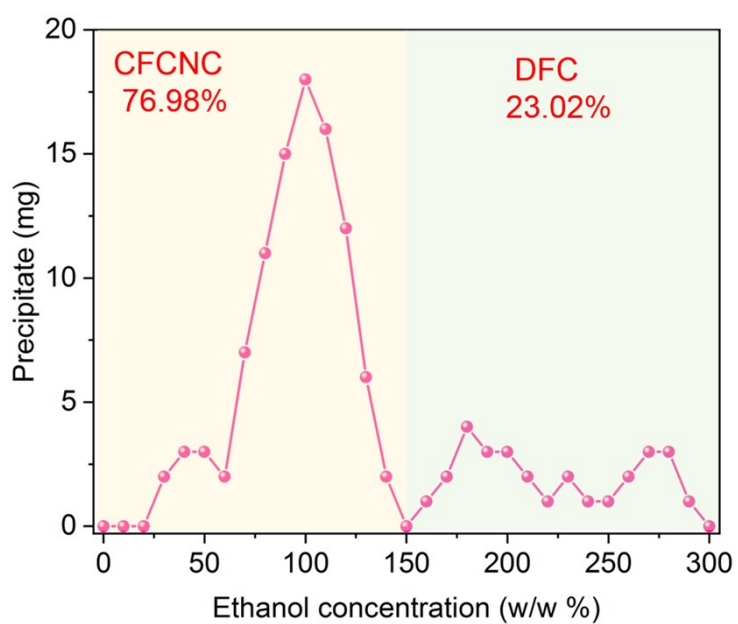

**Figure S5.** Ethanol mediated precipitation of CFCNC and DFC.

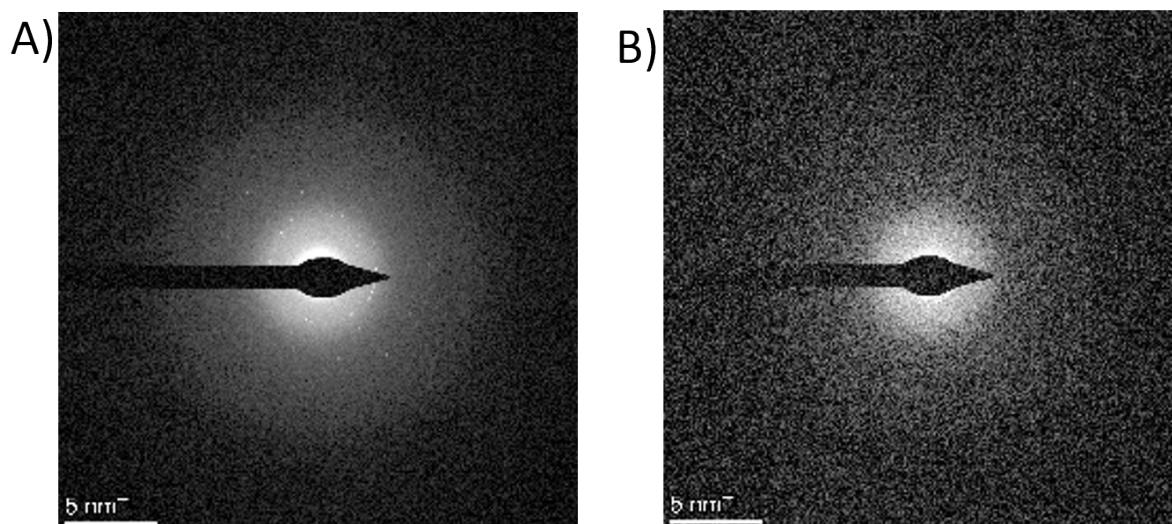

**Figure S6.** Selected area electron diffraction (SAED) of **A)** CFCNC showing crystalline features **B)** DFC displaying the amorphous nature.

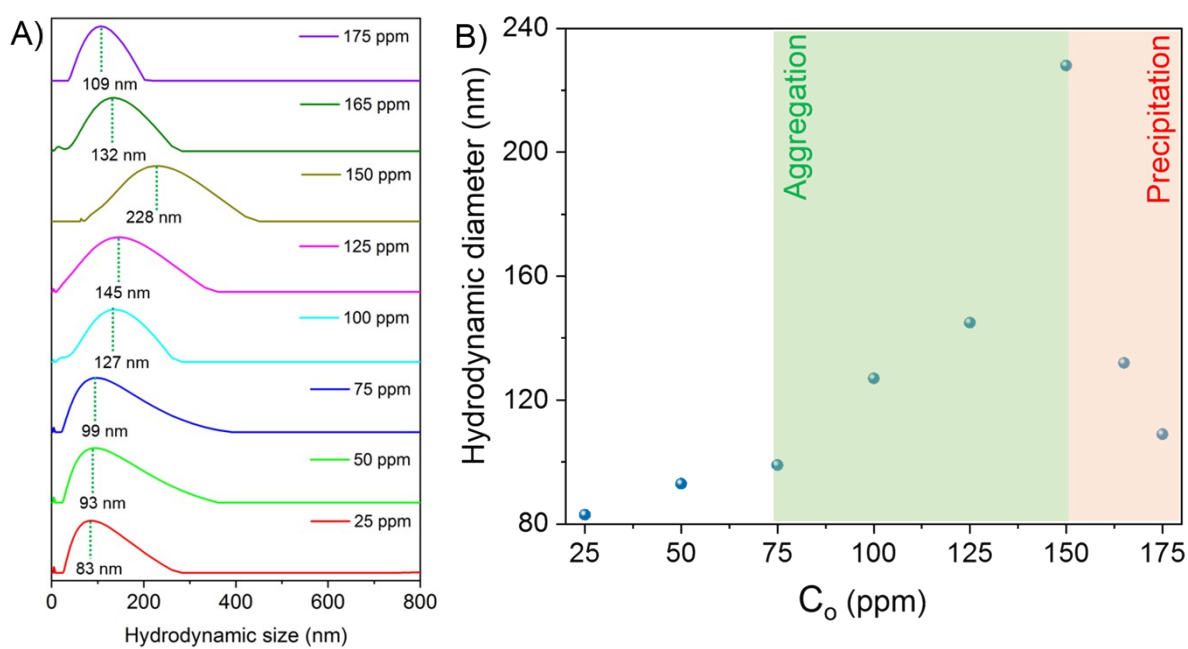

**Figure S7. A)** DLS measurement showing hydrodynamic size of the supernatant at different  $\text{Nd}^{3+}$  concentration. **B)** Plot of hydrodynamic size of Nd-CFNC aggregates in the supernatant against initial concentration ( $C_0$ ) of  $\text{Nd}^{3+}$ .

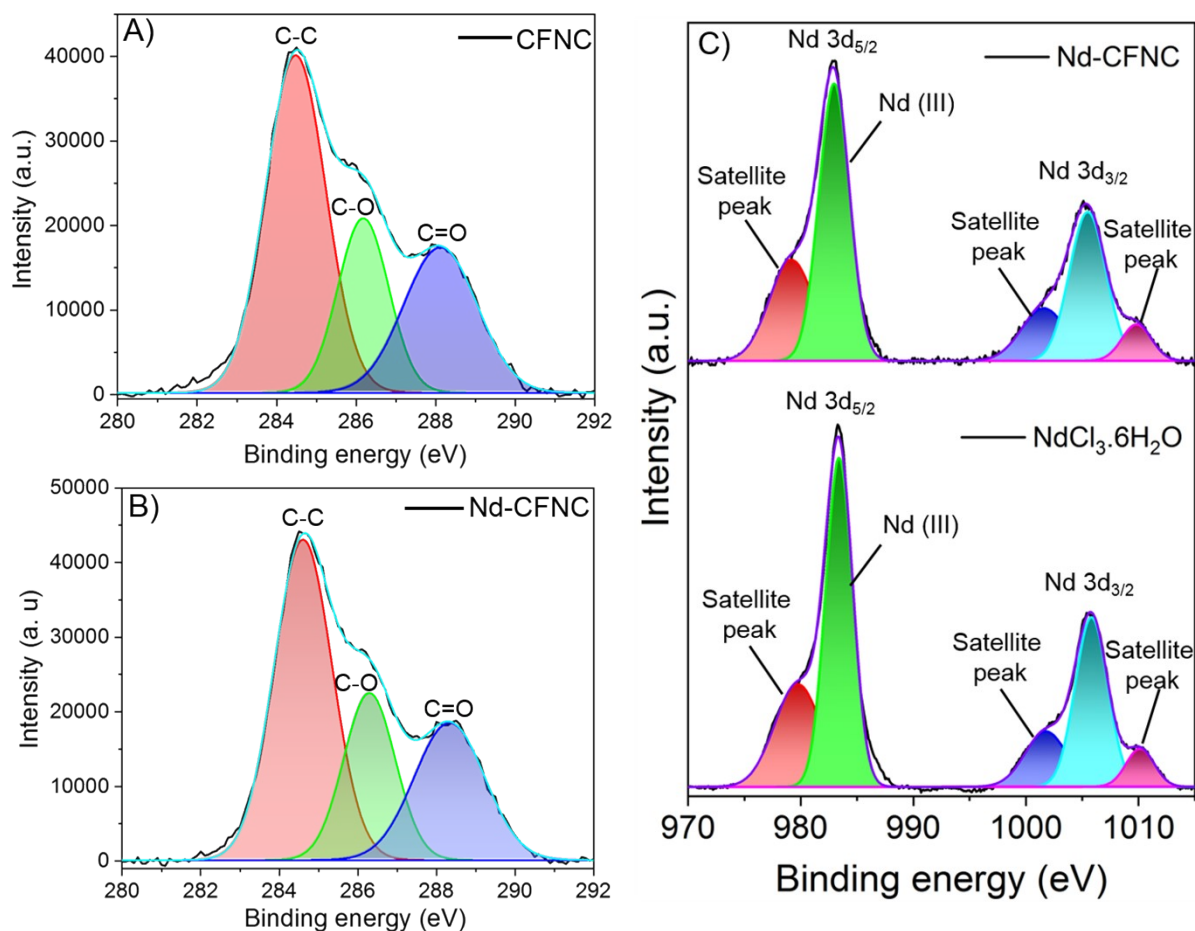

**Figure S8.** A) C 1s spectrum of CFNC. B) C 1s spectrum of Nd-CFNC. C) Nd 3d spectra of NdCl<sub>3</sub>·6H<sub>2</sub>O salt and Nd-CFNC precipitate.

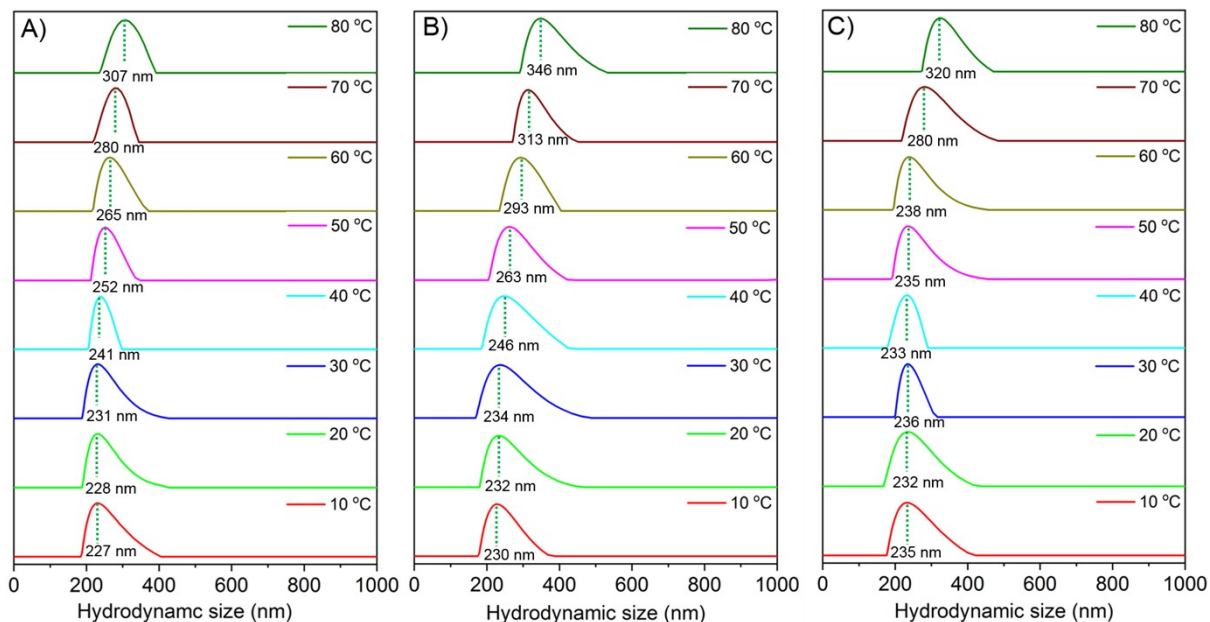

**Figure S9.** Change in the hydrodynamic size of CFNC in the supernatant A) When heated Nd<sup>3+</sup> solution was added to CFNC at various temperatures. B) When Nd<sup>3+</sup> solution was added to the

heated CFNC at different temperatures. C) When already formed Nd-CFNC complex was heated at various temperatures.

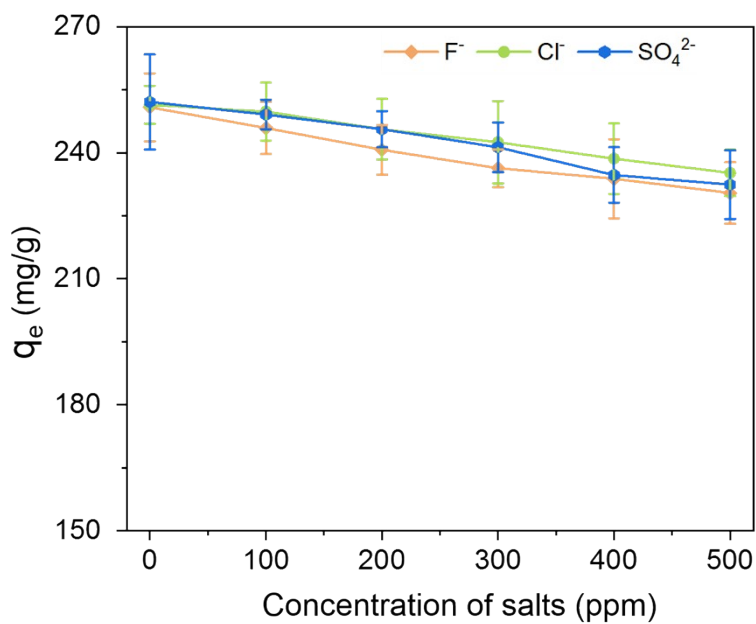

**Figure S10.**  $Nd^{3+}$  removal capacity of CFNC in presence of monovalent ( $F^-$ ,  $Cl^-$ ), and divalent anions ( $SO_4^{2-}$ ).

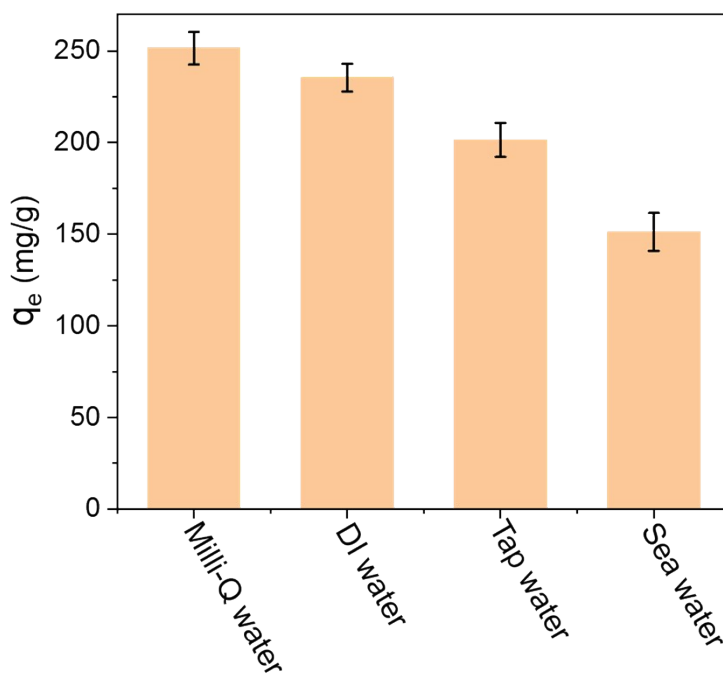

**Figure S11.** Comparison of  $Nd^{3+}$  removal capacity of CFNC in milli-Q water, DI water, tap water and sea water.

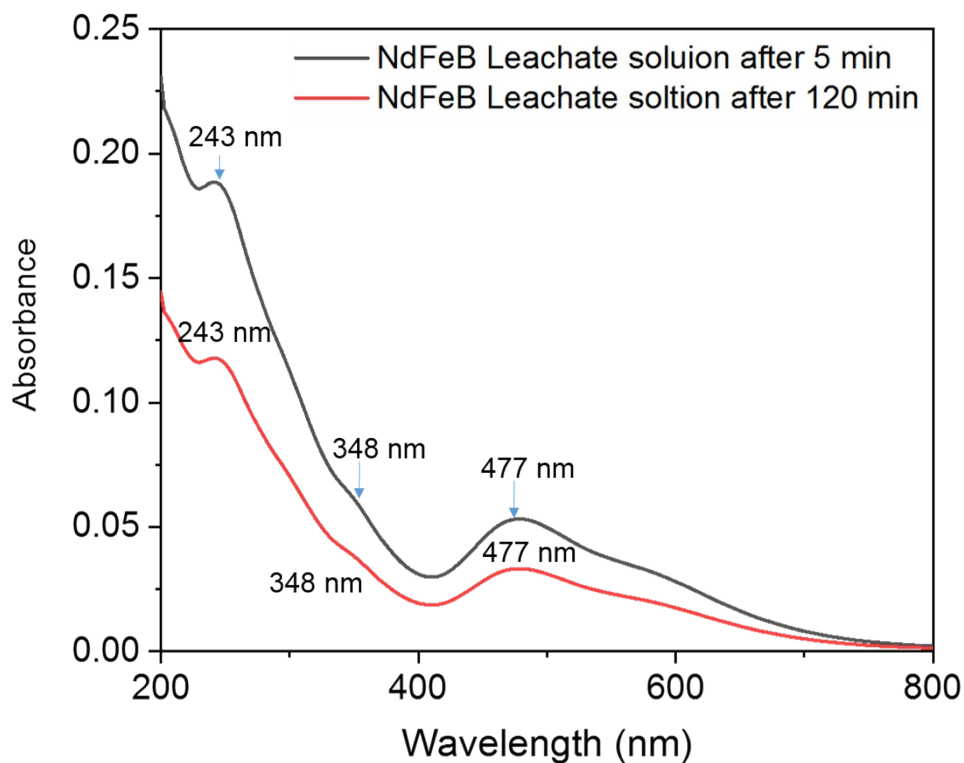

**Figure S12.** UV-Vis spectra of NdFeB leachate after 5 min and 120 min digestion with acid.

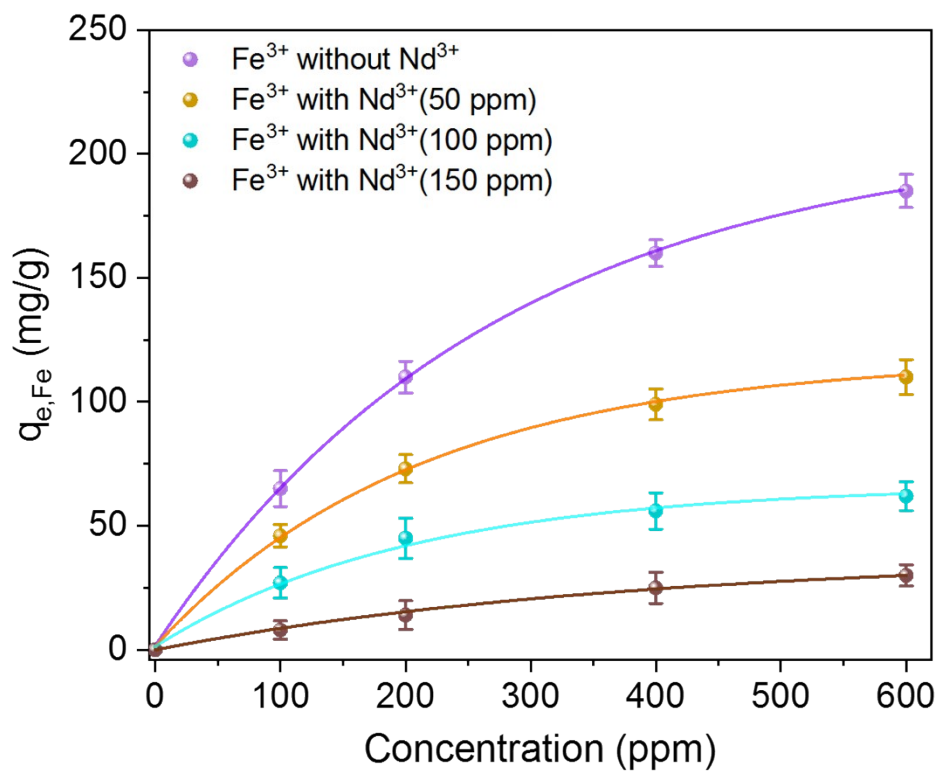

**Figure S13.**  $\text{Fe}^{3+}$  removal capacity in the absence and presence of various concentration of  $\text{Nd}^{3+}$ .

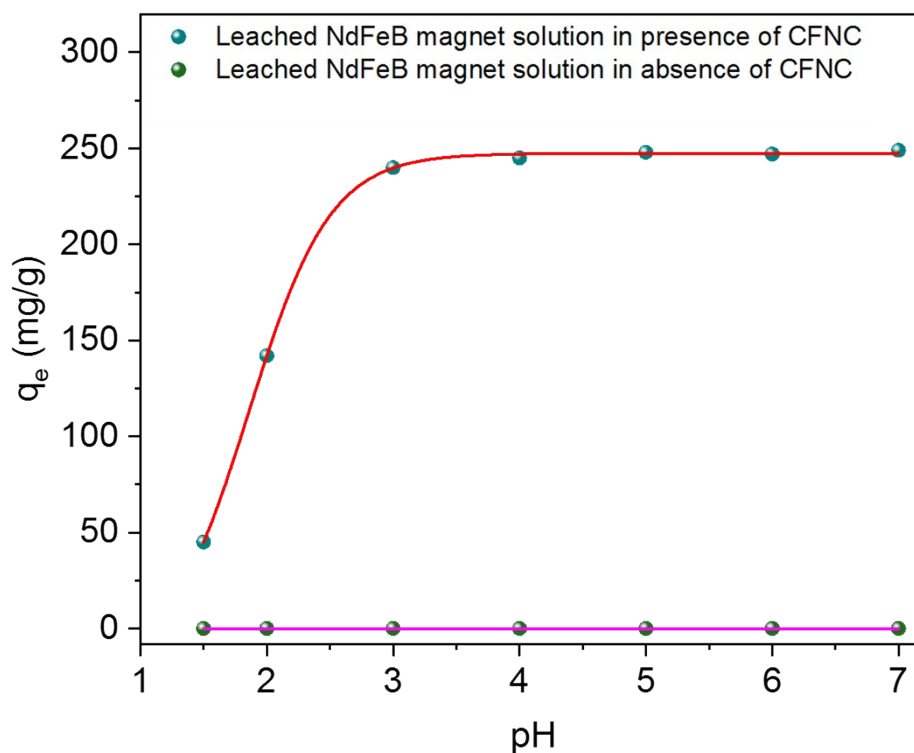

**Figure S14.**  $\text{Nd}^{3+}$  removal capacity from the leached NdFeB magnet solution in the presence and absence of CFNC at different pH.

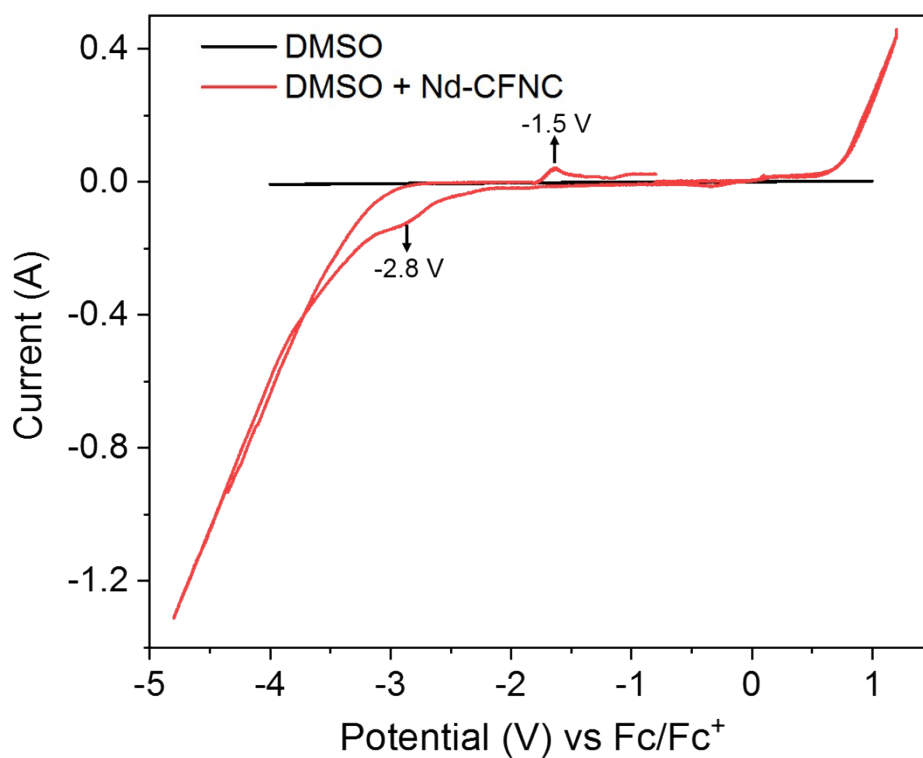

**Figure S15.** Cyclic voltammogram of DMSO and Nd-CFNC in DMSO.



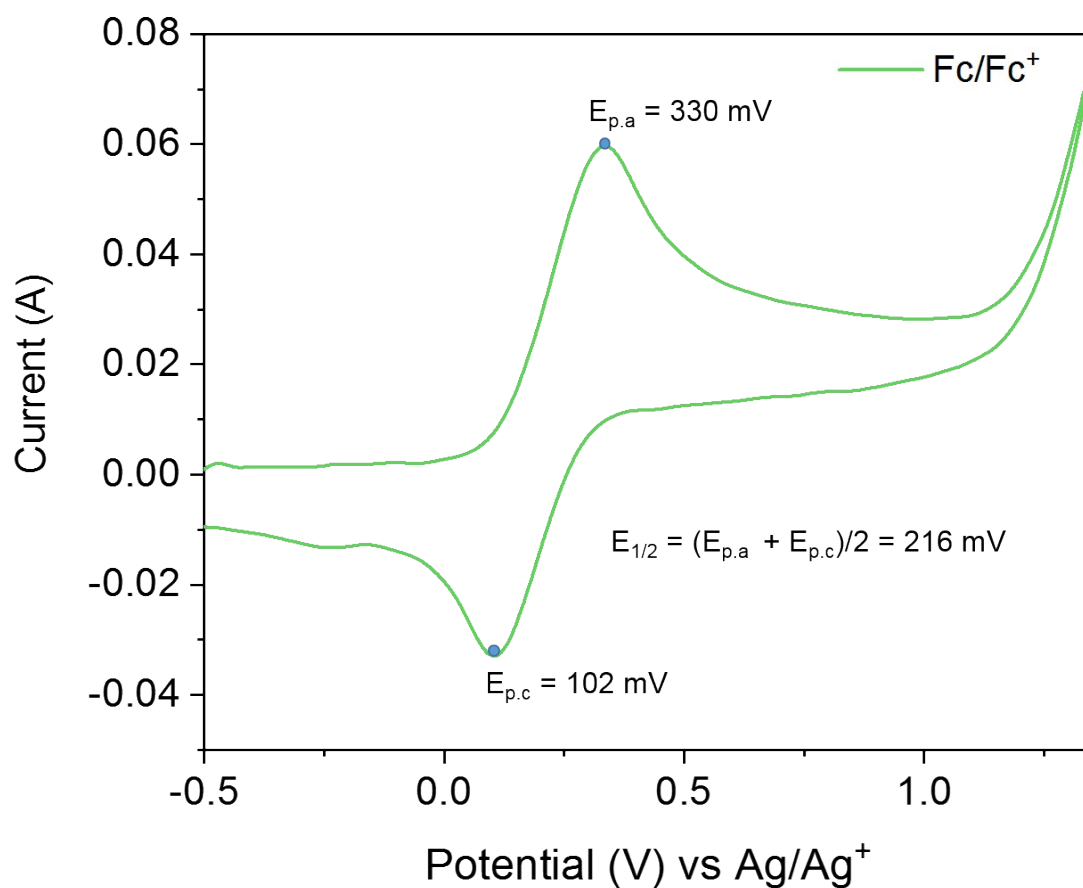

**Figure S16.** Cyclic voltammogram of Fc/Fc<sup>+</sup> vs Ag/Ag<sup>+</sup>.

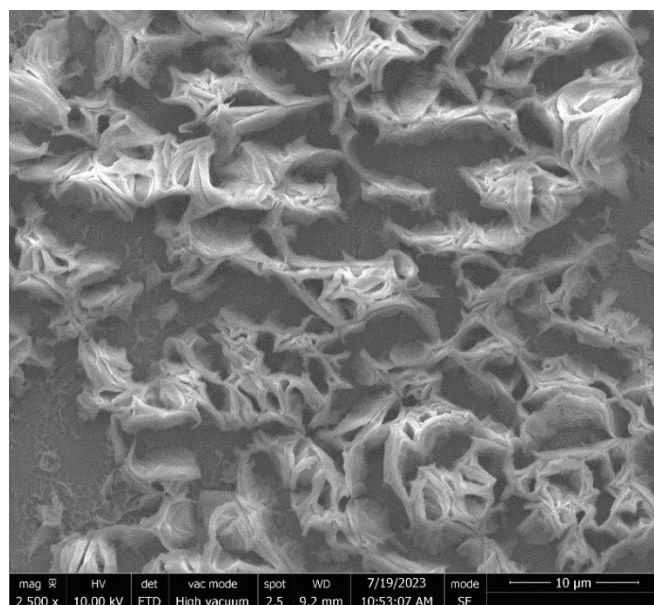

**Figure S17.** SEM image of the electrodeposited material (Nd/Nd<sub>2</sub>O<sub>3</sub>) that shows irregular morphology and porous nature.

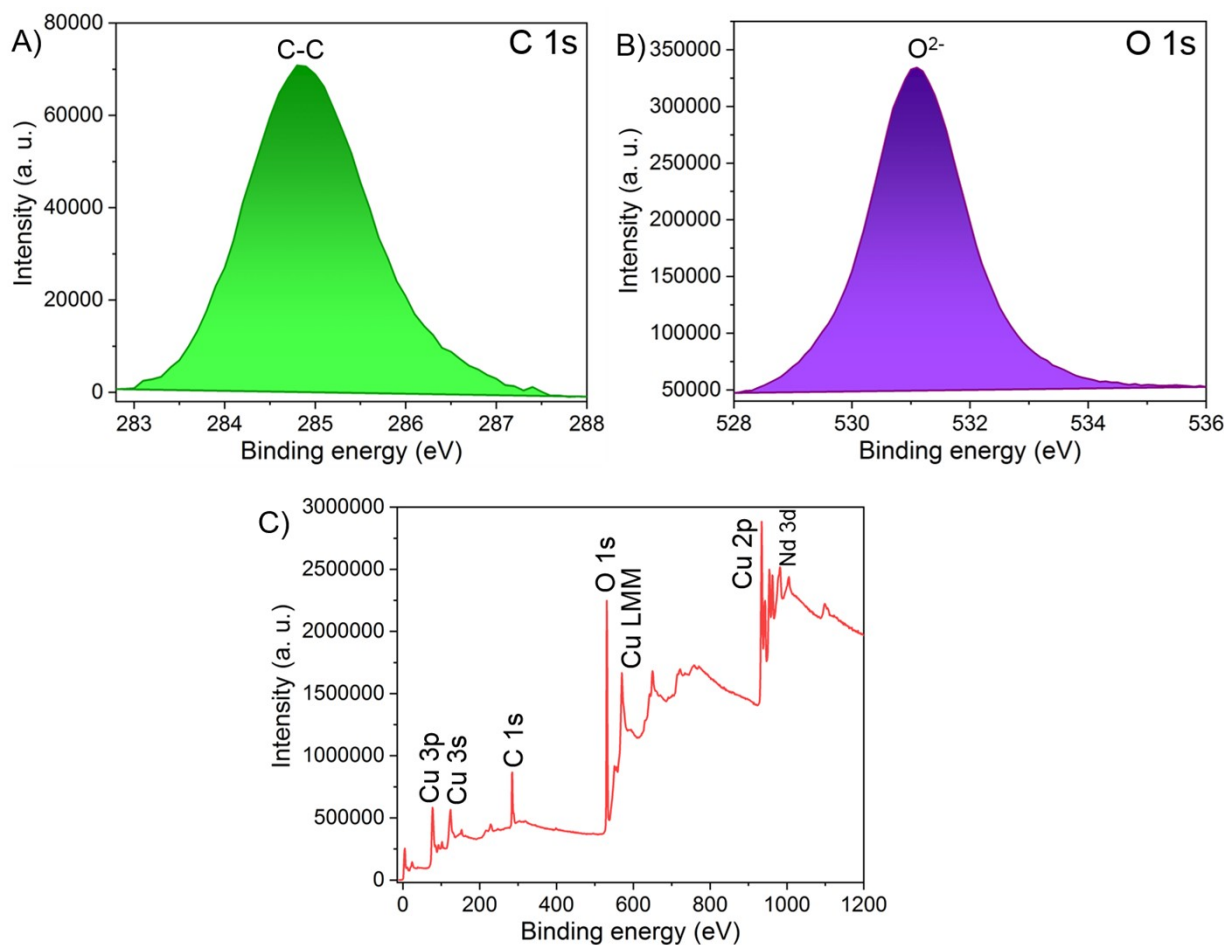

**Figure S18.** A) C 1s spectrum of electrodeposited Nd/Nd<sub>2</sub>O<sub>3</sub>. B) O 1s spectrum of electrodeposited Nd/Nd<sub>2</sub>O<sub>3</sub>. C) Survey spectrum of Nd/Nd<sub>2</sub>O<sub>3</sub> deposited on copper electrode.

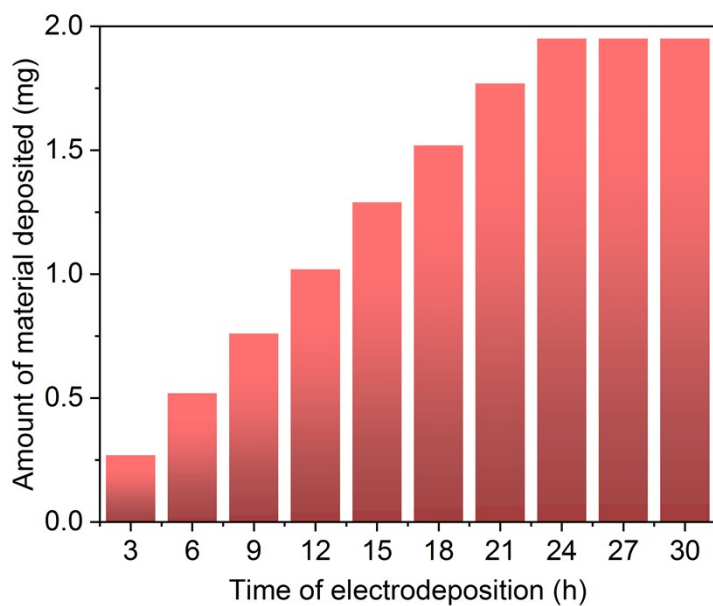

**Figure S19.** Amount of electrodeposited material as a function of deposition time.

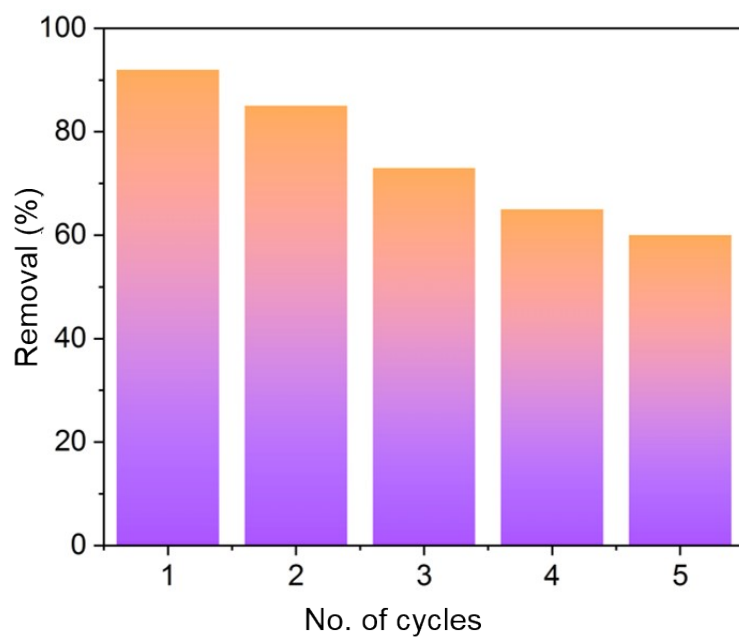

**Figure S20.** Reusability of CFNC for  $\text{Nd}^{3+}$  adsorption.

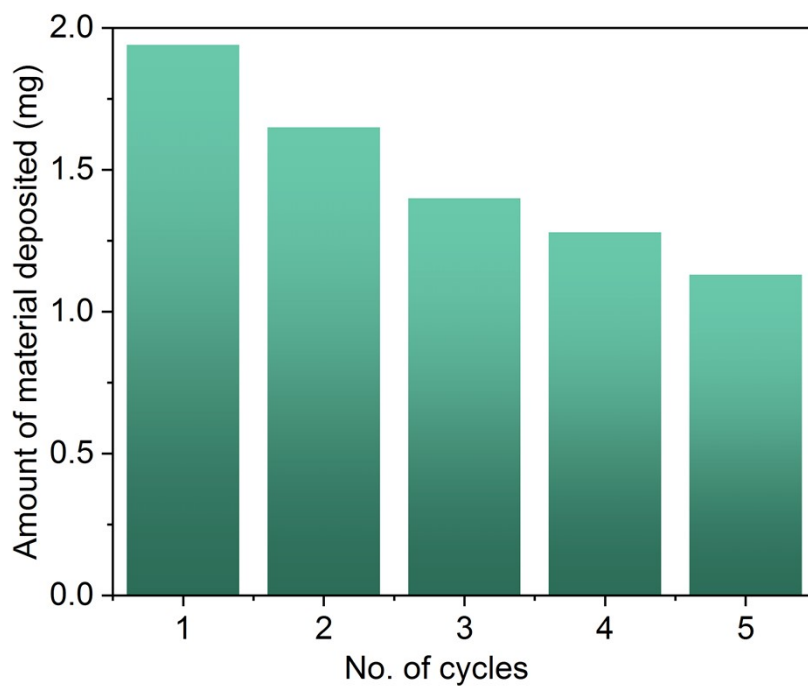

**Figure S21.** Amount of material electrodeposited after reusing CFNC for five successive cycles.

| <b>Categories</b>                |                                                                                 | <b>Cost</b> |
|----------------------------------|---------------------------------------------------------------------------------|-------------|
| <b>Materials</b>                 | Wood pulp cellulose                                                             | \$767       |
|                                  | Sodium chloride (NaCl)                                                          | \$1,132     |
|                                  | Sodium chlorite (NaClO <sub>2</sub> )                                           | \$10,800    |
|                                  | Sodium metaperiodate (NaIO <sub>4</sub> )                                       | \$18,392    |
|                                  | Hydrogen peroxide (30%, H <sub>2</sub> O <sub>2</sub> )                         | \$2,382     |
|                                  | Sodium hydroxide (NaOH)                                                         | \$106       |
|                                  | Nitric acid (HNO <sub>3</sub> , trace metal basis)                              | \$8,483     |
|                                  | Ethanol                                                                         | \$89        |
| <b>Environment</b>               | Vegetation restoration                                                          | \$932       |
|                                  | Water treatment                                                                 | \$268       |
| <b>Equipment</b>                 | Apparatus required                                                              | \$105       |
|                                  | Instrument charges                                                              | \$2027      |
| <b>Labor</b>                     | Single person                                                                   | \$2500      |
| <b>Electricity</b>               | Solar electricity                                                               | \$500       |
| <b>Water</b>                     | –                                                                               | \$50        |
| <b>Taxes</b>                     | FCC                                                                             | \$1         |
|                                  | OAC                                                                             | \$244       |
|                                  | Indirect                                                                        | \$35        |
|                                  | General                                                                         | \$160       |
|                                  | ADC                                                                             | \$75        |
|                                  | Resource Tax                                                                    | \$1953      |
| <b>Total<br/>Production cost</b> |                                                                                 | \$51,001    |
| <b>Total Market value</b>        | \$123/Kg x 700 Kg of Nd + \$50/Kg x<br>300 Kg of Nd <sub>2</sub> O <sub>3</sub> | \$101,100   |
| <b>Benefit</b>                   | Market value – production cost                                                  | \$50,099    |

**Table S1.** Cost-benefit analysis for obtaining 1 ton of material by our proposed approach.
